# Supplementary material
Source: Springer Nature journal article supplement (https://www.springerprofessional.de/resource/supplementary/13688_2012_3_MOESM2_ESM.pdf/11893960)

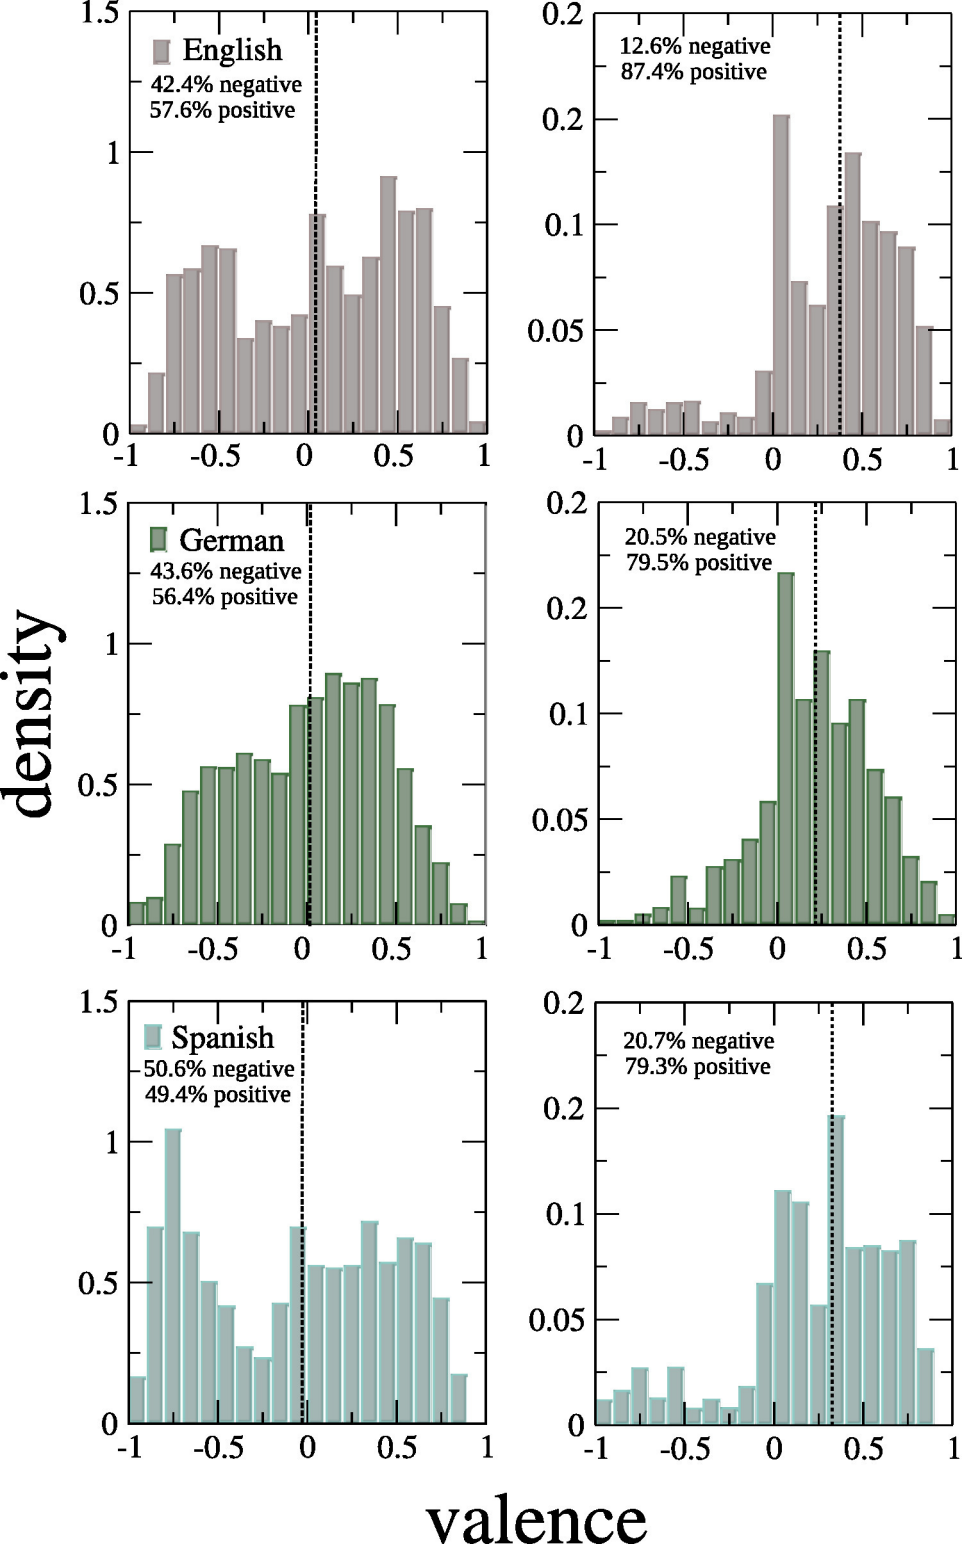

Supplement: MOESM2 [file 11893960]
